# Supplementary material for: Virtual reality improves the accuracy of simulated preoperative planning in temporal bones: a feasibility and validation study
Source: PubMed Central journal article supplement (PMC8266780; doi:10.1007/s00405-020-06360-6), 2020-09-22
Supplement: 405_2020_6360_MOESM1_ESM.pdf [file 405_2020_6360_MOESM1_ESM.pdf]

**Electronic Supplementary Material 1.**

**Measurement task form**

Subject number:

Date:

Temporal bone number:

|                                                                       | VR (mm) | PACS (mm) |
|-----------------------------------------------------------------------|---------|-----------|
| SCREW FIDUCIAL MEASURES: (A=Anterior, P=Posterior, T=Tip, C= Caudal)  |         |           |
| Cortex A – Cortex P                                                   |         |           |
| Cortex A – Cortex T                                                   |         |           |
| Cortex A – Petrous A                                                  |         |           |
| Cortex A – Petrous C                                                  |         |           |
|                                                                       |         |           |
| Cortex P – Cortex T                                                   |         |           |
| Cortex P – Petrous A                                                  |         |           |
| Cortex P – Petrous C                                                  |         |           |
|                                                                       |         |           |
| Cortex T – Petrous A                                                  |         |           |
| Cortex T – Petrous C                                                  |         |           |
|                                                                       |         |           |
| Petrous A – Petrous C                                                 |         |           |
|                                                                       |         |           |
| ANATOMICAL MEASURES:                                                  |         |           |
| Length of malleus (manubrium+head)                                    |         |           |
| Distance from body of incus to mastoid cortex                         |         |           |
| Horizontal diameter of bony ear canal (external meatus)               |         |           |
| Vertical diameter of bony ear canal (internal meatus)                 |         |           |
| Size of facial recess                                                 |         |           |
| Distance from facial recess to mastoid cortex                         |         |           |
| Distance from facial nerve (mastoid part) to recess of bony ear canal |         |           |
| Diameter of oval window                                               |         |           |
| Diameter of round window                                              |         |           |
| Length of styloid process                                             |         |           |
| Distance from sigmoid sinus to back wall of bony ear canal            |         |           |
