# Supplementary material for: Virtual reality improves the accuracy of simulated preoperative planning in temporal bones: a feasibility and validation study
Source: PubMed Central journal article supplement (PMC8266780; doi:10.1007/s00405-020-06360-6), 2020-09-22
Supplement: 405_2020_6360_MOESM2_ESM.pdf [file 405_2020_6360_MOESM2_ESM.pdf]

**Electronic Supplementary Material 2.**

**Validation questionnaire for conventional 2D method (PACS) and VR environment (VR)**

Grading scale 1-5

*1=not true/realistic/useful*

*2=somewhat not true / not realistic / not useful*

*3=neutral*

*4=somewhat true / realistic / useful*

*5=very true / realistic / useful*

| <b>Face validation subgroup (FV):</b>                                   | PACS | VR |
|-------------------------------------------------------------------------|------|----|
| Appearance of anatomical structures                                     |      |    |
| Appearance of tools                                                     |      |    |
| Usability of tools                                                      |      |    |
| Performance of tools                                                    |      |    |
| Haptic feedback                                                         |      |    |
| Ergonomics                                                              |      |    |
| Depth perception                                                        |      |    |
| Quality of graphics                                                     |      |    |
|                                                                         |      |    |
| <b>Content validation subgroup (CV):</b>                                |      |    |
| Learning of anatomy                                                     |      |    |
| Learning of surgical planning                                           |      |    |
| Understanding of anatomical structures                                  |      |    |
| Quality of measuring anatomical structures                              |      |    |
| Understanding the topography and relationships of anatomical structures |      |    |
| Accuracy of measurement tool                                            |      |    |
| Hand-eye-coordination                                                   |      |    |
| Overall score for surgical planning                                     |      |    |
|                                                                         |      |    |
| <b>Global rating subgroup (GR):</b>                                     |      |    |
| Recommend to colleague                                                  |      |    |
| User-friendly                                                           |      |    |
| Inclusion to surgical planning                                          |      |    |
| Understanding of the surgical site                                      |      |    |

**Free response section:**

1. Did you experience nausea/vertigo/headache or any other similar problems during the use of VR application?
2. What kind of problems did you experienced in VR surgical planning? In PACS method?
3. What would be an adequate time for orientation of the VR equipment?
4. What kind of benefits you consider the VR environment has compared to PACS method in surgical planning and in the understanding of topographical anatomy of objects?
5. In what other applications VR environment could be applied (e.g. education/surgical training)
6. Free feedback
